# Supplementary material
Source: ML conference proceedings conference paper supplement (https://aclanthology.org/D18-1505)
Supplement: Attachment [file appendix.pdf › appendix/appendix.pdf]

## **Appendix**

### **A Crowdsourcing Details**

Crowd workers residing in five English-speaking countries (United States, United Kingdom, New Zealand, Australia and Canada) were hired. Each crowd worker had a Level 2 or higher rating on Figure Eight, which corresponds to a “group of more experienced, higher accuracy contributors”. Each contributor had to pass a test questionnaire to be eligible to take part in the experiment. Test questions were also hidden throughout the task and untrusted contributions were removed from the final dataset. For greater quality control, an upper limit of 75 judgments per contributor was enforced.

Crowd workers were paid a total of \$1 for 50 judgments. An internal unpaid workforce (including the first and second author of the paper) of 7 contributors was used to speed up data collection.

| # Judgments |          |         | Average | Sentence                                                                                     |
|-------------|----------|---------|---------|----------------------------------------------------------------------------------------------|
| Positive    | Negative | Neutral |         |                                                                                              |
| 1           | 1        | 7       | 0.50    | the fight scenes are fun , but it grows tedious                                              |
| 3           | 2        | 4       | 0.56    | it 's not exactly a gourmet meal but the fare is fair , even coming from the drive thru      |
| 2           | 3        | 4       | 0.44    | propelled not by characters but by caricatures                                               |
| 4           | 2        | 3       | 0.61    | not everything works , but the average is higher than in mary and most other recent comedies |

Table A1: Examples of neutral sentences for a threshold of 0.66

| # Judgments |          |         | Average | Original | Sentence                                                                                                                                                                                      |
|-------------|----------|---------|---------|----------|-----------------------------------------------------------------------------------------------------------------------------------------------------------------------------------------------|
| Positive    | Negative | Neutral |         |          |                                                                                                                                                                                               |
| 1           | 5        | 3       | 0.28    | Positive | de niro and mcdormand give solid performances , but their screen time is sabotaged by the story 's inability to create interest                                                               |
| 6           | 0        | 3       | 0.83    | Negative | son of the bride may be a good half hour too long but comes replete with a flattering sense of mystery and quietness                                                                          |
| 0           | 5        | 4       | 0.22    | Positive | wasabi is slight fare indeed , with the entire project having the feel of something tossed off quickly ( like one of hubert 's punches ) , but it should go down smoothly enough with popcorn |

Table A2: Examples of flipped sentiment sentences, for a threshold of 0.66

| Model 1    |            | vs | Model 2    |            | Significant |
|------------|------------|----|------------|------------|-------------|
| distill    | no-project |    | distill    | project    | Yes         |
| no-distill | no-project |    | no-distill | project    | Yes         |
| ELMo       | no-project |    | ELMo       | project    | No          |
| no-distill | no-project |    | distill    | no-project | No          |
| no-distill | project    |    | distill    | project    | No          |
| no-distill | no-project |    | ELMo       | no-project | Yes         |
| distill    | no-project |    | ELMo       | no-project | Yes         |
| no-distill | project    |    | ELMo       | project    | Yes         |
| distill    | project    |    | ELMo       | project    | Yes         |

Table A3: Statistical significance using a two-sided Kolmogorov-Smirnov statistic (Massey Jr, 1951) with  $\alpha = 0.001$ .

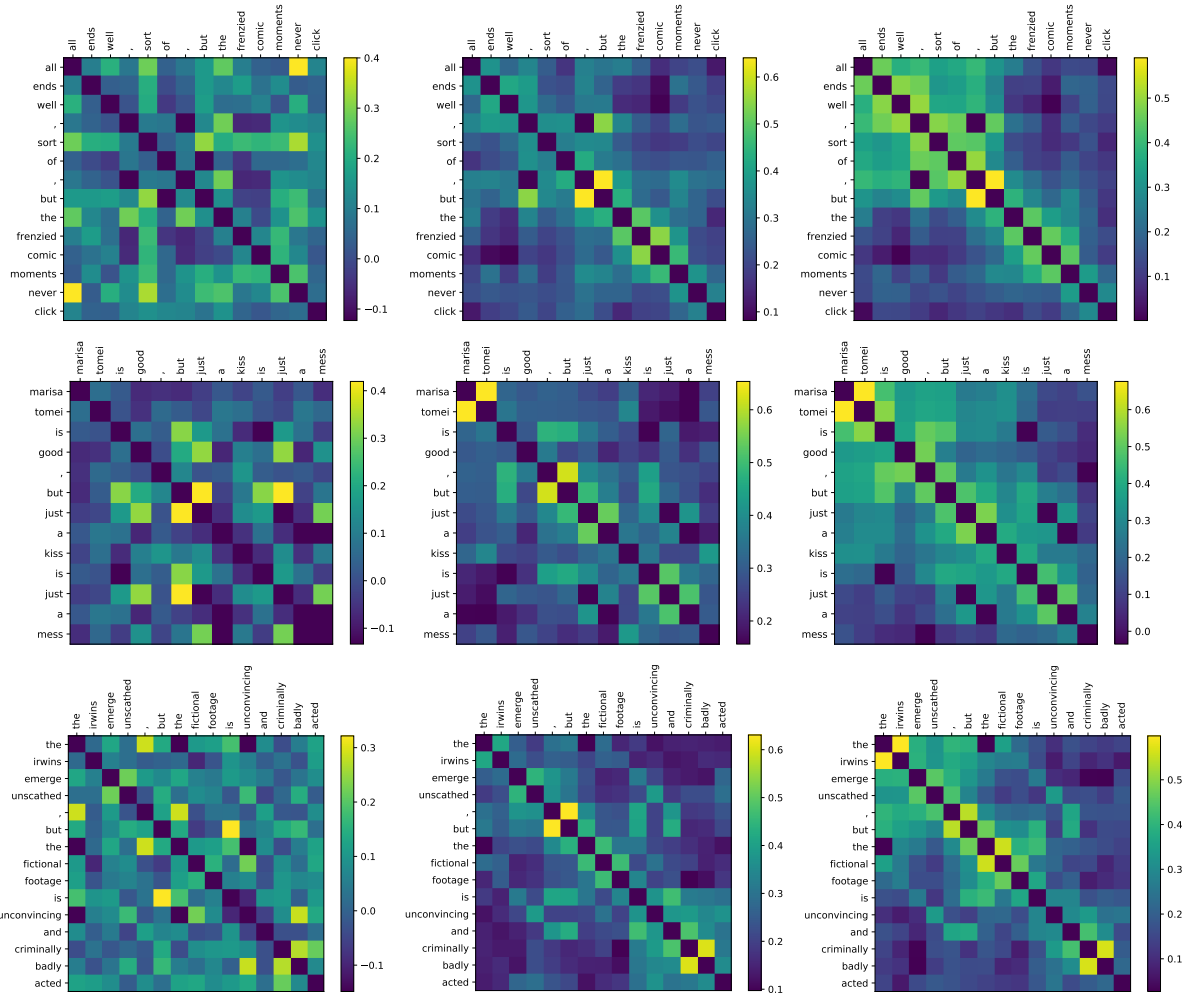

Figure A1: Heat map showing the cosine similarity between pairs of word vectors within a single sentence. The leftmost column has word2vec (Mikolov et al., 2013) embeddings, fine-tuned on the downstream task (SST2). The middle column contains the original ELMo embeddings (Peters et al., 2018a) without any fine-tuning. The representations from the three layers (token layer and two LSTM layers) have been averaged. The rightmost column contains ELMo embeddings fine-tuned on the downstream task. For better visualization, the cosine similarity between identical words has been set equal to the minimum value in the map.
