# Supplementary material
Source: ML conference proceedings conference paper supplement (https://aclanthology.org/D18-1505)

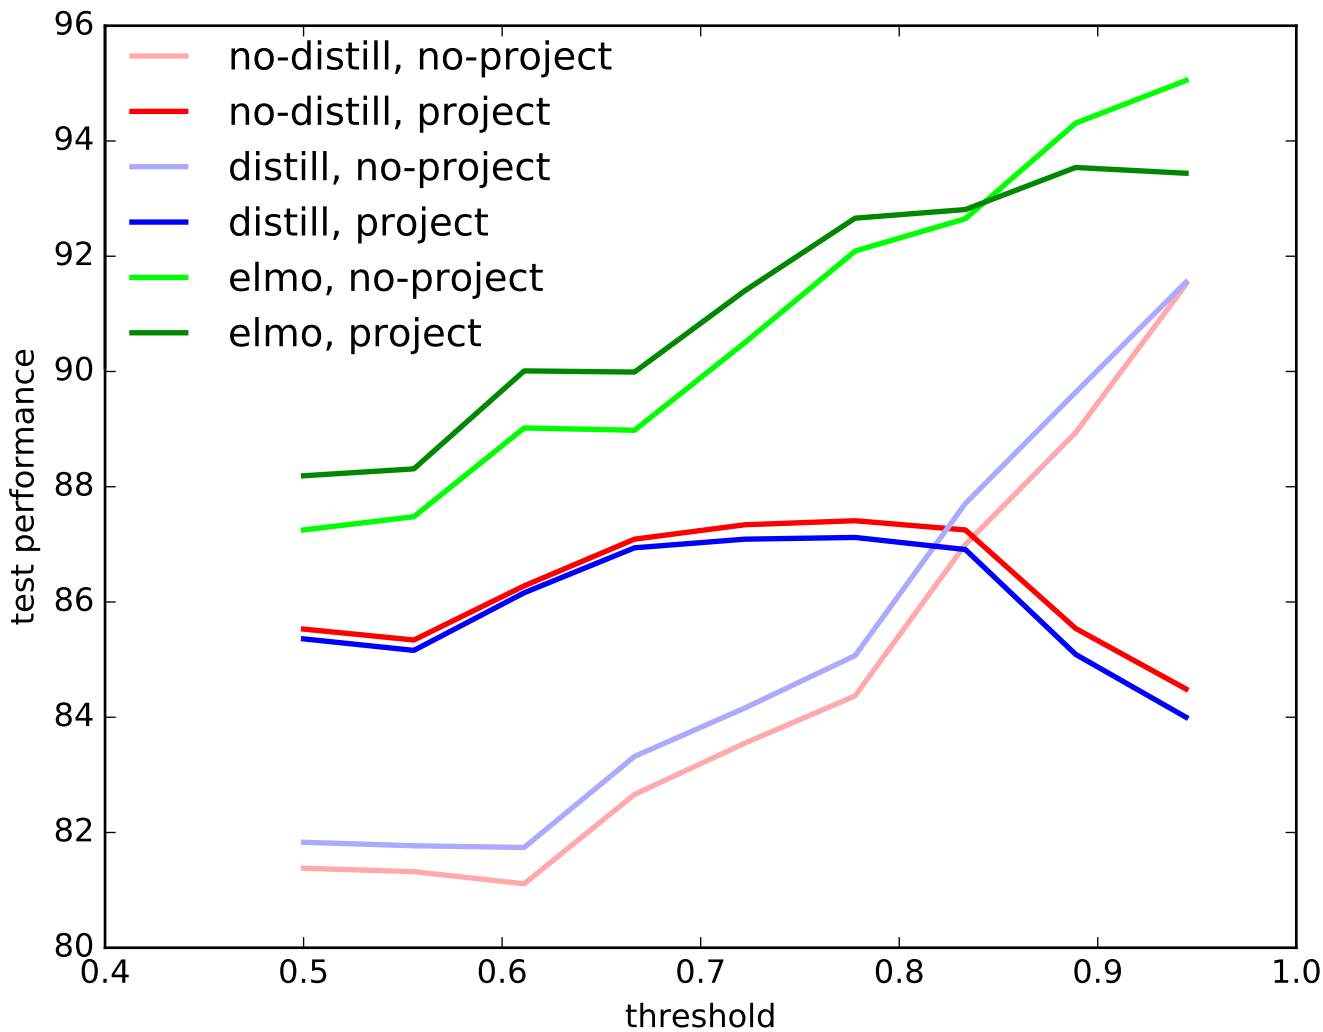

Supplement: Attachment [file avg_epochs.pdf › code/constraint-learning/analysis/avg_epochs.pdf]
